# Supplementary material for: Therapeutic Drug Monitoring of Ivacaftor, Lumacaftor, Tezacaftor, and Elexacaftor in Cystic Fibrosis: Where Are We Now?
Source: MDPI journal article supplement (doi:10.3390/pharmaceutics14081674), 2022-08-11
Supplement: s1 [file s1]

## Supplementary Materials

# Therapeutic Drug Monitoring of Ivacaftor, Lumacaftor, Tezacaftor, and Elexacaftor in Cystic Fibrosis: Where Are We Now?

Eva Choong, Alain Sauty, Angela Koutsokera, Sylvain Blanchon, Pascal André and Laurent Decosterd

**Table S1.** Impact of Other Drugs on Elexacaftor, Tezacaftor and/or Ivacaftor [4].

| Dose and Schedule                                                 |                                   | Effect on ELX, TEZ and/or IVA PK | Geometric Mean Ratio (90% CI) of ELX, TEZ, IVA<br>No Effect = 1.0 |                                         |
|-------------------------------------------------------------------|-----------------------------------|----------------------------------|-------------------------------------------------------------------|-----------------------------------------|
|                                                                   |                                   |                                  | AUC                                                               | C <sub>max</sub>                        |
| Itraconazole<br>200 mg q12h on Day 1, followed by 200 mg qd       | TEZ 25 mg qd + IVA 50 mg qd       | ↑ Tezacaftor<br>↑ Ivacaftor      | 4.02 (3.71, 4.63)<br>15.6 (13.4, 18.1)                            | 2.83 (2.62, 3.07)<br>8.60 (7.41, 9.98)  |
| Itraconazole<br>200 mg qd                                         | ELX 20 mg + TEZ 50 mg single dose | ↑ Elexacaftor<br>↑ Tezacaftor    | 2.83 (2.59, 3.10)<br>4.51 (3.85, 5.29)                            | 1.05 (0.977, 1.13)<br>1.48 (1.33, 1.65) |
| Ketoconazole<br>400 mg qd                                         | IVA 150 mg single dose            | ↑ Ivacaftor                      | 8.45 (7.14, 10.0)                                                 | 2.65 (2.21, 3.18)                       |
| Ciprofloxacin<br>750 mg q12h                                      | TEZ 50 mg q12h + IVA 150 mg q12h  | ↔ Tezacaftor<br>↑ Ivacaftor *    | 1.08 (1.03, 1.13)<br>1.17 (1.06, 1.30)                            | 1.05 (0.99, 1.11)<br>1.18 (1.06, 1.31)  |
| Rifampin<br>600 mg qd                                             | IVA 150 mg single dose            | ↓ Ivacaftor                      | 0.114 (0.097, 0.136)                                              | 0.200 (0.168, 0.239)                    |
| Fluconazole<br>400 mg single dose on Day 1, followed by 200 mg qd | IVA 150 mg q12h                   | ↑ Ivacaftor                      | 2.95 (2.27, 3.82)                                                 | 2.47 (1.93, 3.17)                       |

↑ = increase, ↓ = decrease, ↔ = no change. CI = Confidence interval; ELX= elexacaftor; TEZ = tezacaftor; IVA = ivacaftor; PK = Pharmacokinetics; \* Effect is not clinically significant.

**Table S2.** PK parameters of ivacaftor and ivacaftor-lumacaftor standard therapy [14].

| IVA monotherapy<br>healthy vs CF after 150mg |                                          | LUM/IVA                                     |                                                   |
|----------------------------------------------|------------------------------------------|---------------------------------------------|---------------------------------------------------|
|                                              |                                          | LUM                                         | LUM/IVA                                           |
| Mean (±SD) AUC                               | 10.6 vs 5.26 µg·h/ml                     | n/a                                         | 198 ± 64.8 µg·h/ml LUM<br>3.66 ± 2.25 µg·h/ml IVA |
| Mean (±SD) C <sub>max</sub>                  | 0.768 vs 0.233 µg/ml                     | n/a                                         | 25.0 ± 7.96 µg/ml LUM<br>0.602 ± 0.304 µg/ml IVA  |
| Time to steady state                         | 3–5 days with accumulation ratio 2.2–2.9 | After 7 days with accumulation ratio of 1.9 | 7 days (IVA when given with LUM)                  |
